# Supplementary material for: WRF4PALM v1.0: a mesoscale dynamical driver for the microscale PALM model system 6.0
Source: Copernicus journal article supplement (doi:10.5194/gmd-14-2503-2021), 2021-05-06
Supplement: Supplementary file 1 [file gmd-14-2503-2021-supplement.zip]

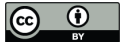

## *Supplement of*

# **WRF4PALM v1.0: a mesoscale dynamical driver for the microscale PALM model system 6.0**

**Dongqi Lin et al.**

*Correspondence to:* Dongqi Lin ([dongqi.lin@pg.canterbury.ac.nz](mailto:dongqi.lin@pg.canterbury.ac.nz))

- [gmd-14-2503-2021-supplement-title-page.pdf](#)
- INPUT
  - [chch\\_airport\\_10m\\_NW\\_dynamic](#)
  - [chch\\_airport\\_10m\\_NW\\_p3d](#)
  - [chch\\_airport\\_10m\\_NW\\_static](#)
- [chch\\_airport\\_10m\\_NW.cfg](#)

The copyright of individual parts of the supplement might differ from the article licence.
